# Supplementary material for: Single-Use Capture Purification of Adeno-Associated Viral Gene Transfer Vectors by Membrane-Based Steric Exclusion Chromatography
Source: PubMed Central journal article supplement (PMC10116406; doi:10.1089/hum.2019.284), 2021-09-23
Supplement: Supp_TableS1.pdf [file Supp_TableS1.pdf]

**Supplementary Table ST1.** Product recoveries, total protein, and host cell DNA balances for medium-scale lysates of selected AAV serotypes and recombinant variants purified with membrane-based SXC.

| Product         | SXC step                        | Vol (mL) | Virus product |          |              | Total Protein |                |            | Impurities       |                   |           |
|-----------------|---------------------------------|----------|---------------|----------|--------------|---------------|----------------|------------|------------------|-------------------|-----------|
|                 |                                 |          | PCR           |          |              |               |                |            | dsDNA            |                   |           |
|                 |                                 |          | vg/mL         | vg       | %            | µg/mL         | µg             | %          | ng/mL            | ng                | %         |
| AAV2            | Start (before PEG conditioning) | 9.5      | 1.01E+10      | 9.57E+10 | 100.0        | 827.6 ± 1.2   | 7,861.8 ± 11.7 | 100.0      | 9,031.8 ± 100.8  | 85,802.1 ± 957.6  | 100.0     |
|                 | Flow-through+wash               | 40.0     | 0.00E+00      | 0.00E+00 | -            | 139.9 ± 0.8   | 5,597.6 ± 33.6 | 71.2 ± 0.4 | n.d.             | n.d.              | n.d.      |
|                 | Eluate                          | 20.0     | 6.98E+09      | 1.40E+11 | 145.9        | 60.1 ± 0.5    | 1,201.5 ± 9.5  | 15.3 ± 0.1 | 264.6 ± 12.2     | 5,291.0 ± 244.5   | 6.2 ± 0.3 |
| AAV6            | Start (before PEG conditioning) | 9.5      | 9.70E+09      | 9.21E+10 | 100.0        | 836.7 ± 6.4   | 7,948.7 ± 60.8 | 100.0      | 14,137.7 ± 100.5 | 134,308.2 ± 954.8 | 100.0     |
|                 | Flow-through+wash               | 45.0     | 0.00E+00      | 0.00E+00 | -            | 141.2 ± 1.2   | 6,351.8 ± 54.5 | 79.9 ± 0.9 | n.d.             | n.d.              | n.d.      |
|                 | Eluate                          | 18.5     | 4.91E+09      | 9.33E+10 | 101.3        | 83.1 ± 0.7    | 1,605.4 ± 13.0 | 20.2 ± 0.2 | 161.0 ± 12.1     | 3,157.1 ± 235.5   | 2.4 ± 0.2 |
| AAV-1P5         | Start (before PEG conditioning) | 9.5      | 1.96E+10      | 1.86E+11 | 100.0        | 824.1 ± 4.3   | 7,829.0 ± 40.9 | 100.0      | 10,106.9 ± 51.1  | 96,015.6 ± 485.5  | 100.0     |
|                 | Flow-through+wash               | 45.0     | 0.00E+00      | 0.00E+00 | -            | 139.0 ± 0.7   | 6,252.8 ± 29.3 | 79.9 ± 0.6 | n.d.             | n.d.              | n.d.      |
|                 | Eluate                          | 18.6     | 1.12E+10      | 2.12E+11 | 114.0        | 85.3 ± 2.3    | 1,639.9 ± 44.7 | 20.9 ± 0.6 | 92.7 ± 9.5       | 2,034.1 ± 239.7   | 2.1 ± 0.2 |
| AAV-9A2         | Start (before PEG conditioning) | 9.5      | 2.11E+10      | 2.01E+11 | 100.0        | 879.8 ± 3.3   | 8,358.1 ± 31.4 | 100.0      | 11,324.3 ± 51.8  | 107,580.9 ± 492.1 | 100.0     |
|                 | Flow-through+wash               | 45.0     | 0.00E+00      | 0.00E+00 | -            | 145.4 ± 0.7   | 6,541.7 ± 33.3 | 78.3 ± 0.5 | n.d.             | n.d.              | n.d.      |
|                 | Eluate                          | 18.6     | 1.51E+10      | 2.87E+11 | 143.0        | 88.7 ± 1.0    | 1,706.2 ± 20.3 | 20.4 ± 0.3 | 92.7 ± 12.3      | 1,797.7 ± 240.8   | 1.7 ± 0.2 |
| Mean of eluates |                                 |          |               |          | 126.1 ± 10.9 |               |                | 18.6 ± 0.2 |                  |                   | 3.4 ± 0.2 |

n.d.; not determined
