# Supplementary material for: Single-Use Capture Purification of Adeno-Associated Viral Gene Transfer Vectors by Membrane-Based Steric Exclusion Chromatography
Source: PubMed Central journal article supplement (PMC10116406; doi:10.1089/hum.2019.284), 2021-09-23
Supplement: Supp_TableS2.pdf [file Supp_TableS2.pdf]

**Supplementary Table ST2.** Troubleshooting.

| <b>Issue</b>                                                     | <b>Possible reason(s)</b>                                                                                                                                          | <b>Solution</b>                                                                                                                                                                                                                                                                                                                                           |
|------------------------------------------------------------------|--------------------------------------------------------------------------------------------------------------------------------------------------------------------|-----------------------------------------------------------------------------------------------------------------------------------------------------------------------------------------------------------------------------------------------------------------------------------------------------------------------------------------------------------|
| <i>AAV production</i>                                            |                                                                                                                                                                    |                                                                                                                                                                                                                                                                                                                                                           |
| Cell seeding and transfection                                    | Poor transfection ratio or cell death due to wrong cell numbers                                                                                                    | Optimize cell density                                                                                                                                                                                                                                                                                                                                     |
| <i>AAV purification</i>                                          |                                                                                                                                                                    |                                                                                                                                                                                                                                                                                                                                                           |
| Filter clogging while filtering sample                           | Too many submicron-sized impurities                                                                                                                                | Centrifuge the virus harvest at >8000 rcf and use a cascade of filters for clarification, e.g., 0.8 µm, 0.45 µm, and 0.2 µm                                                                                                                                                                                                                               |
| Turbidity when mixing sample with PEG                            | Virus aggregation                                                                                                                                                  | Mix the PEG with the sample in-line with a chromatography system. See Section 3.5.1                                                                                                                                                                                                                                                                       |
|                                                                  | Virus aggregation or impurity aggregation                                                                                                                          | Dilute the sample or screen different buffers for increased colloidal stability (e.g., spiking with sugars such as sucrose or sorbitol)                                                                                                                                                                                                                   |
| Pressure and UV spikes during chromatography run                 | Air in the UV cell of the chromatography system                                                                                                                    | Degas buffers and remove the air from the system. See equipment manual                                                                                                                                                                                                                                                                                    |
| No UV signal during elution or product found in the flow-through | Low concentration of virus particles in the elution                                                                                                                | Ensure the PEG concentration is 10% for loading. Lower PEG concentrations might result in product loss during sample loading                                                                                                                                                                                                                              |
| Low product yields or multiple peaks during elution              | Overloaded membrane (fouling), presence of extracellular vesicles or incomplete elution of AAV particles due to host cell impurities or isoelectric point profiles | Fractionate elution to screen for the presence of the AAV particles or perform a gradient elution instead of a step to improve resolution.<br>Test different elution conditions at higher/lower conductivities to disrupt the interactions of AAV particles or impurities due to non-specific interactions or isoelectric points (see discussion in text) |
| <i>Analytics</i>                                                 |                                                                                                                                                                    |                                                                                                                                                                                                                                                                                                                                                           |
| Variable cell transduction from different elution fractions      | Variable potency due to AAV concentration or presence of host cell impurities                                                                                      | Perform cell transduction at constant viral genome levels. The presence of host cell impurities might influence cell transduction <i>in vitro</i> (see discussion in text)                                                                                                                                                                                |
| Stain precipitates on the grid (TEM)                             | Precipitation of uranyl phosphate due to the use of PBS                                                                                                            | Use phosphotungstic acid (PTA) instead of uranyl acetate                                                                                                                                                                                                                                                                                                  |
|                                                                  |                                                                                                                                                                    | Dialyze the sample overnight to a Tris-based buffer in order to eliminate the PBS                                                                                                                                                                                                                                                                         |
| Grid overstaining or film breakage (TEM)                         | Overloading of the grid with product                                                                                                                               | Dilute the sample                                                                                                                                                                                                                                                                                                                                         |
